# Supplementary figures and images for: Tau oligomers in cerebrospinal fluid in Alzheimer's disease
Source: PubMed Central journal article supplement — Ann Clin Transl Neurol. 2017 Mar 1;4(4):226–35. doi: 10.1002/acn3.382 (PMC5376754; doi:10.1002/acn3.382), 2017-03-01

(A)

T22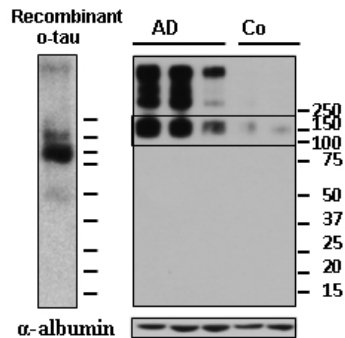

(B)

TOMA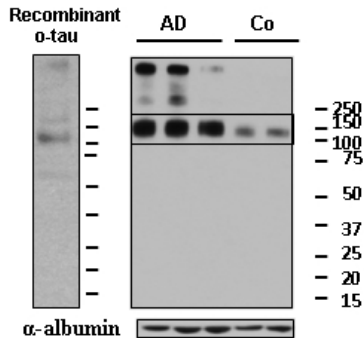

(C)

T22 pre-incubated with tau oligomers (4:1)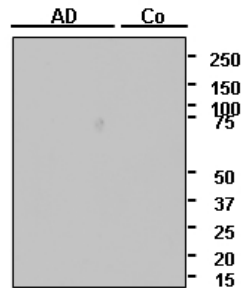

(D)

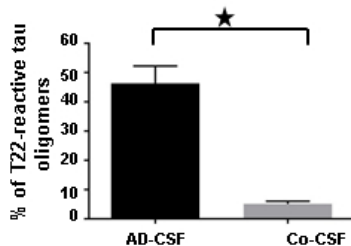

(E)

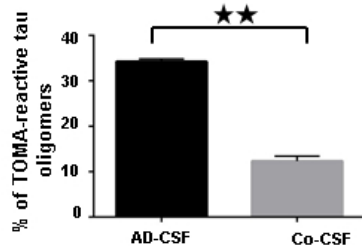

(F)

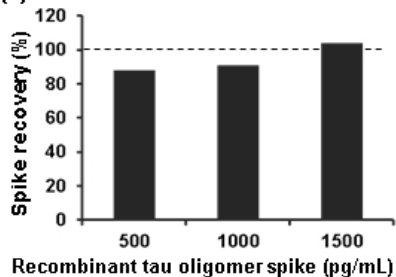

Supplement: ACN3-4-226-s001.pdf [file ACN3-4-226-s001.pdf]
